# Supplementary material for: Cloning of Acyl-ACP Thioesterase FatA fromArachis hypogaeaL. and Its Expression inEscherichia coli
Source: Hindawi journal article supplement (doi:10.1155/2012/652579), 2012-01-01
Supplement: f1 [file 652579.f1.doc]

**Supplementary data**


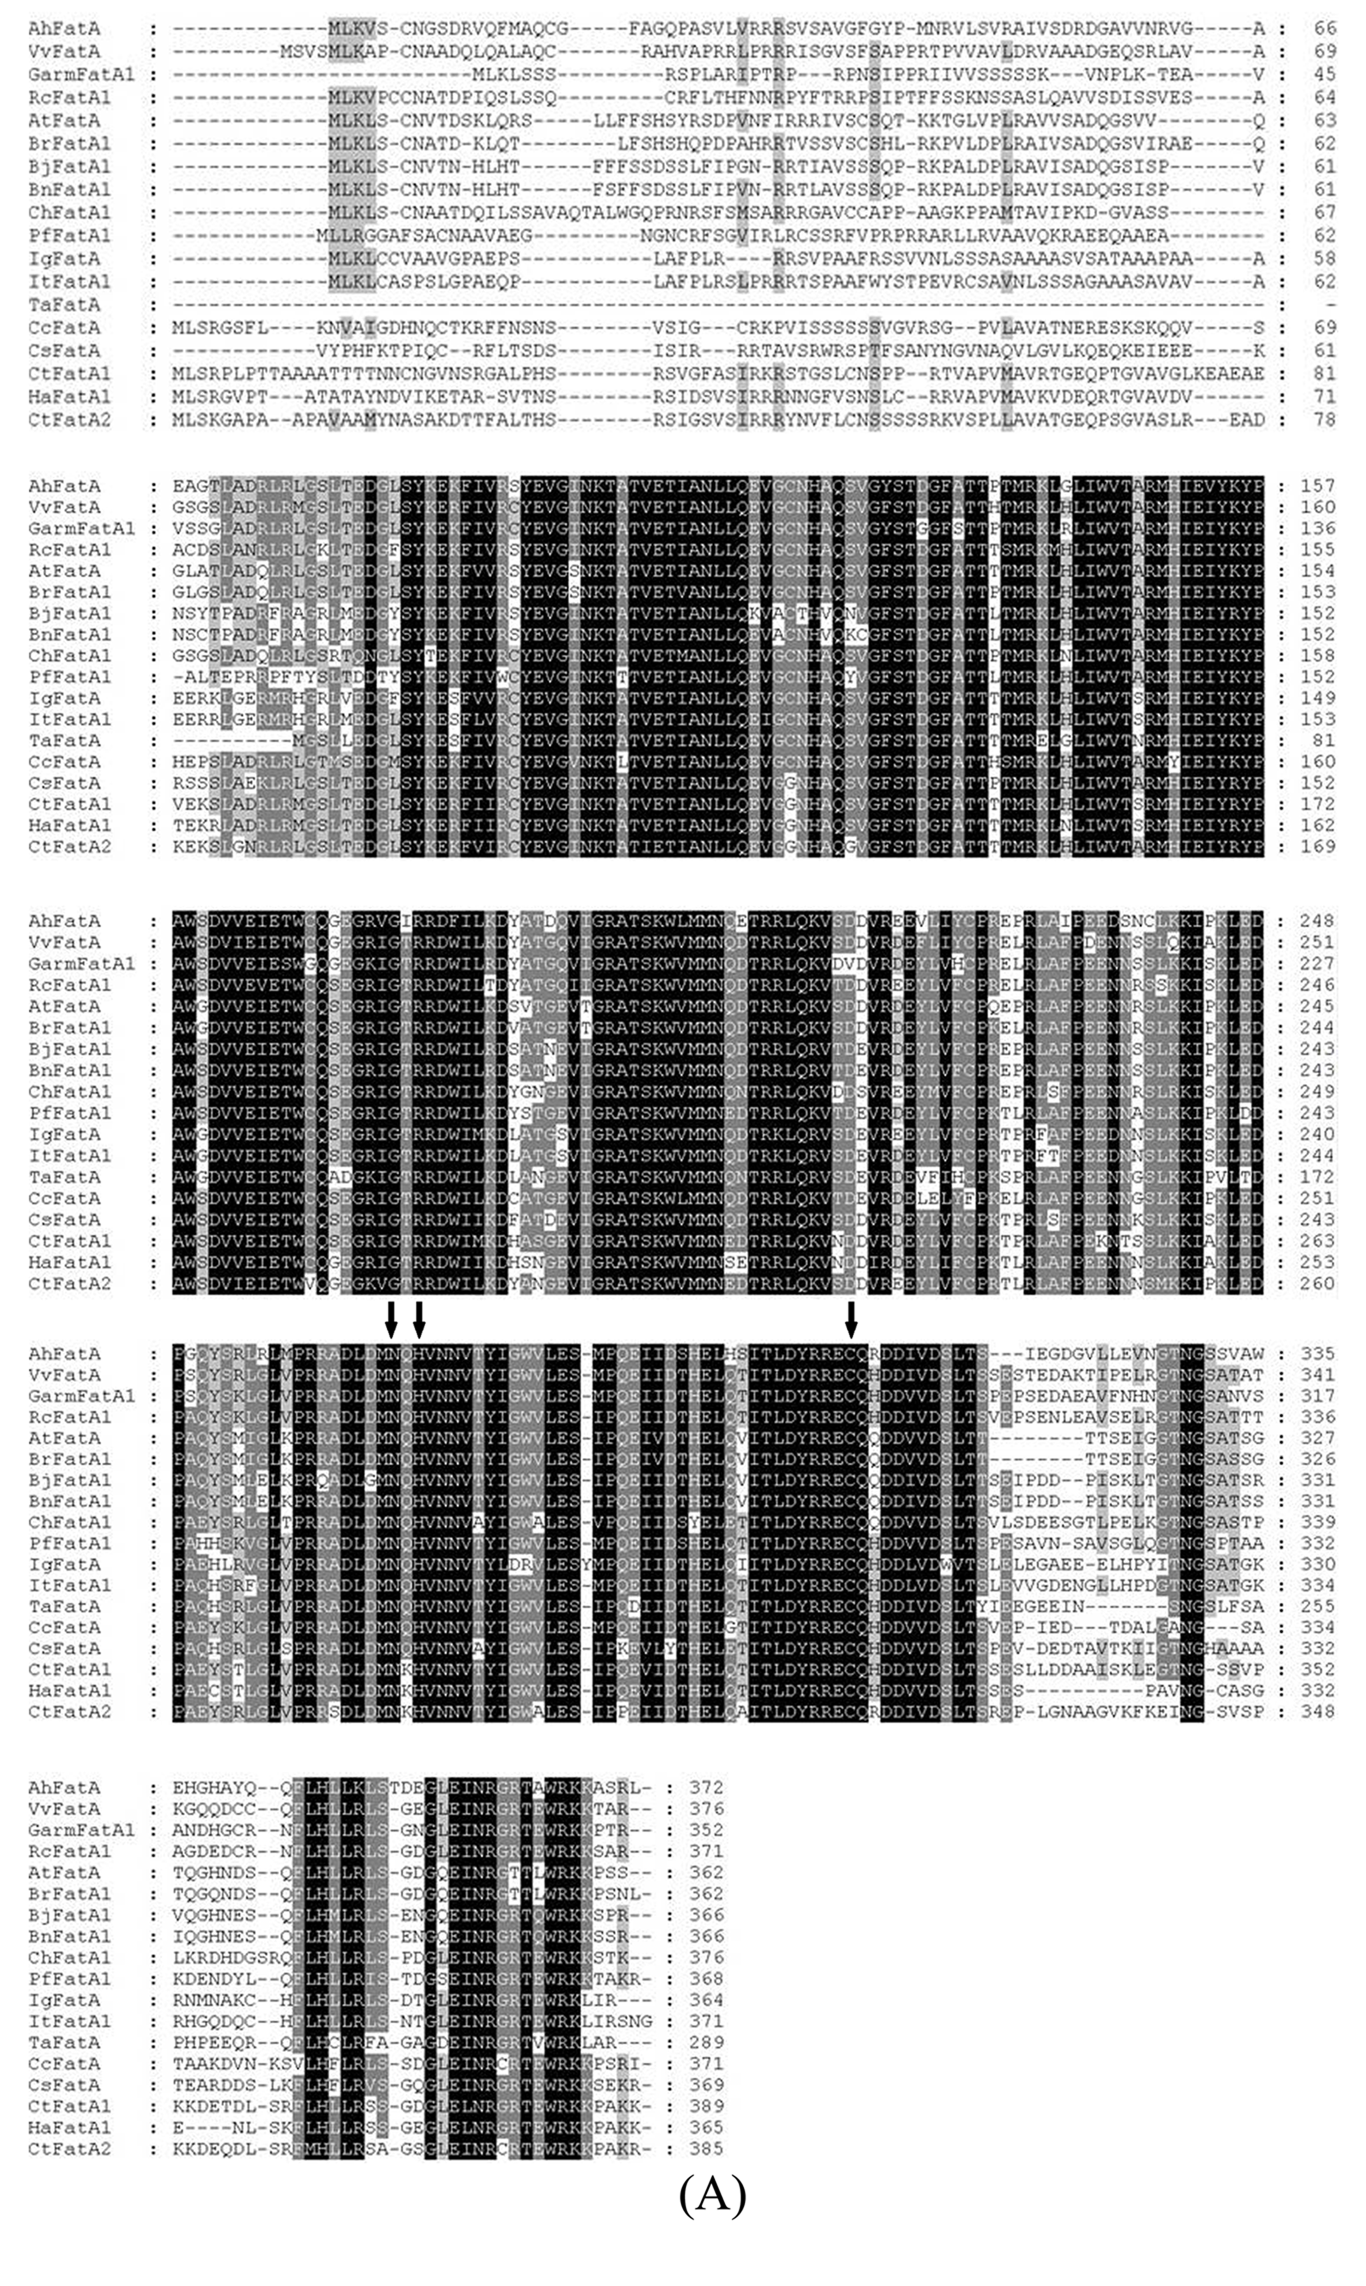


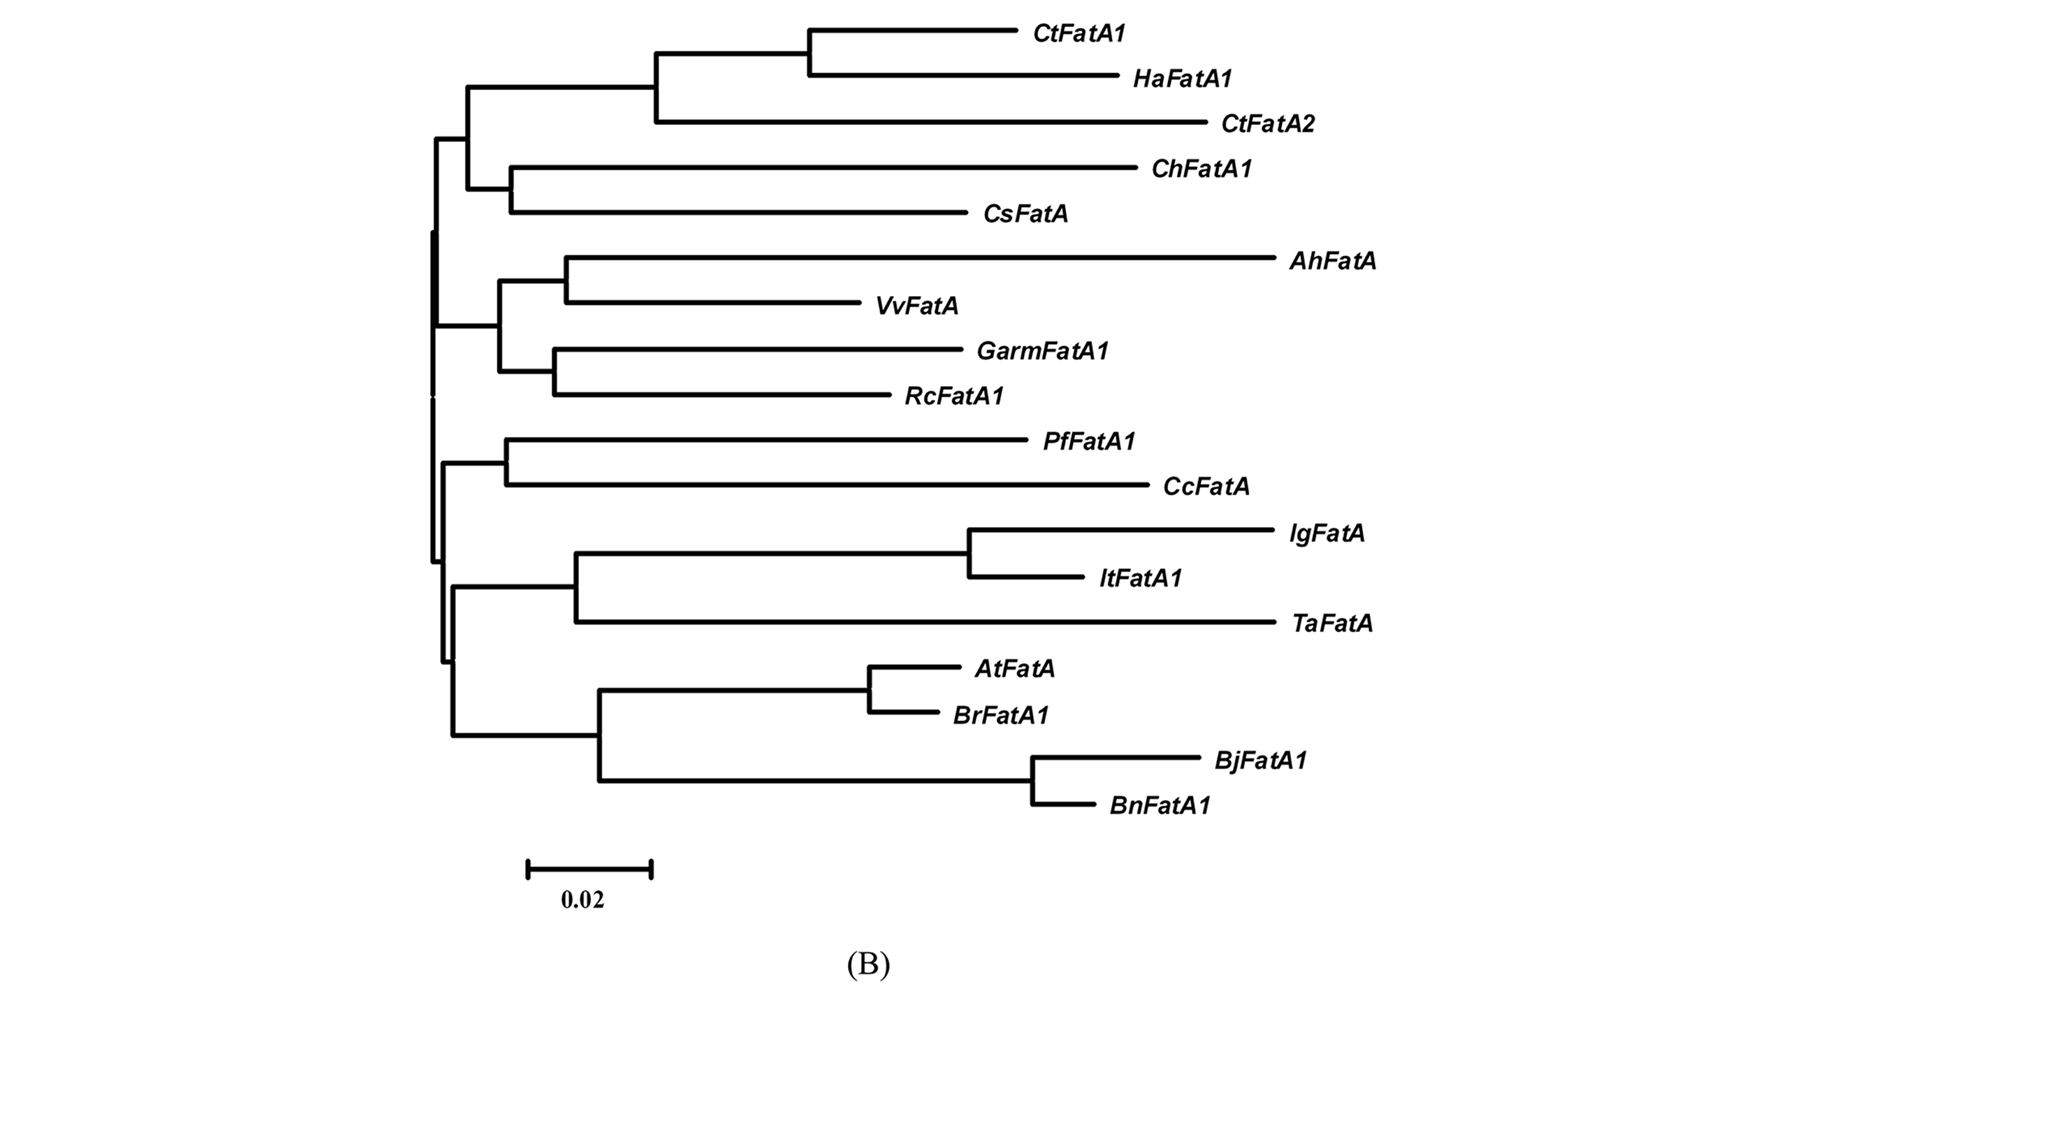


Supplementary FIGURE 1: Sequence analysis of *Ah*FatA and any other plants. (A) Amino acid sequence alignment of *Ah*FatA and the *FatA* sequences of other plants. The identical amino acids were showed in white with black background and the conserved amino acids were showed in white and gray background. The three conserved residues are indicated by arrows. (B) Phylogenetic comparison of *Ah*FatA and other FatAs, according to ClustalX-derived protein alignments, generated by MEGA 4.0. The amino acid sequence derived from *At*FatA(*Arabidopsis thaliana*, 186510396); *Bj*FatA (*Brassica juncea*, 14148965); *Bn*FatA1 (*Brassica napus*, 435010); *Br*FatA1 (*Brassica rapa*, 595956); *Cc*FatA(*Capsicum chinense*, 11386000); *Ch*FatA1 (*Cuphea hookeriana*, 3859831); *Cs*FatA1 (*Coriandrum sativum*, 457209); *Ct*FatA1 (*Carthamus tinctorius*, 404027); *Ct*FatA2 (*Carthamus tinctorius*, 404025); *Garm*FatA1 (*Garcinia mangostana*, 1930076); *Ha*FatA1 (*Helianthus annuus*, 33325241); *Ig*FatA (*Iris germanica*, 12004038); *It*FatA (*Iris tectorum*, 18653907); *Pf*FatA1(*Perilla frutescens*, 18653911); *Rc*FatA1(*Ricinus communis*, 152206073); *Ta*FatA(*Triticum aestivum*, 21262149); *Vv*FatA(*Vitis vinifera*, 225470104c).


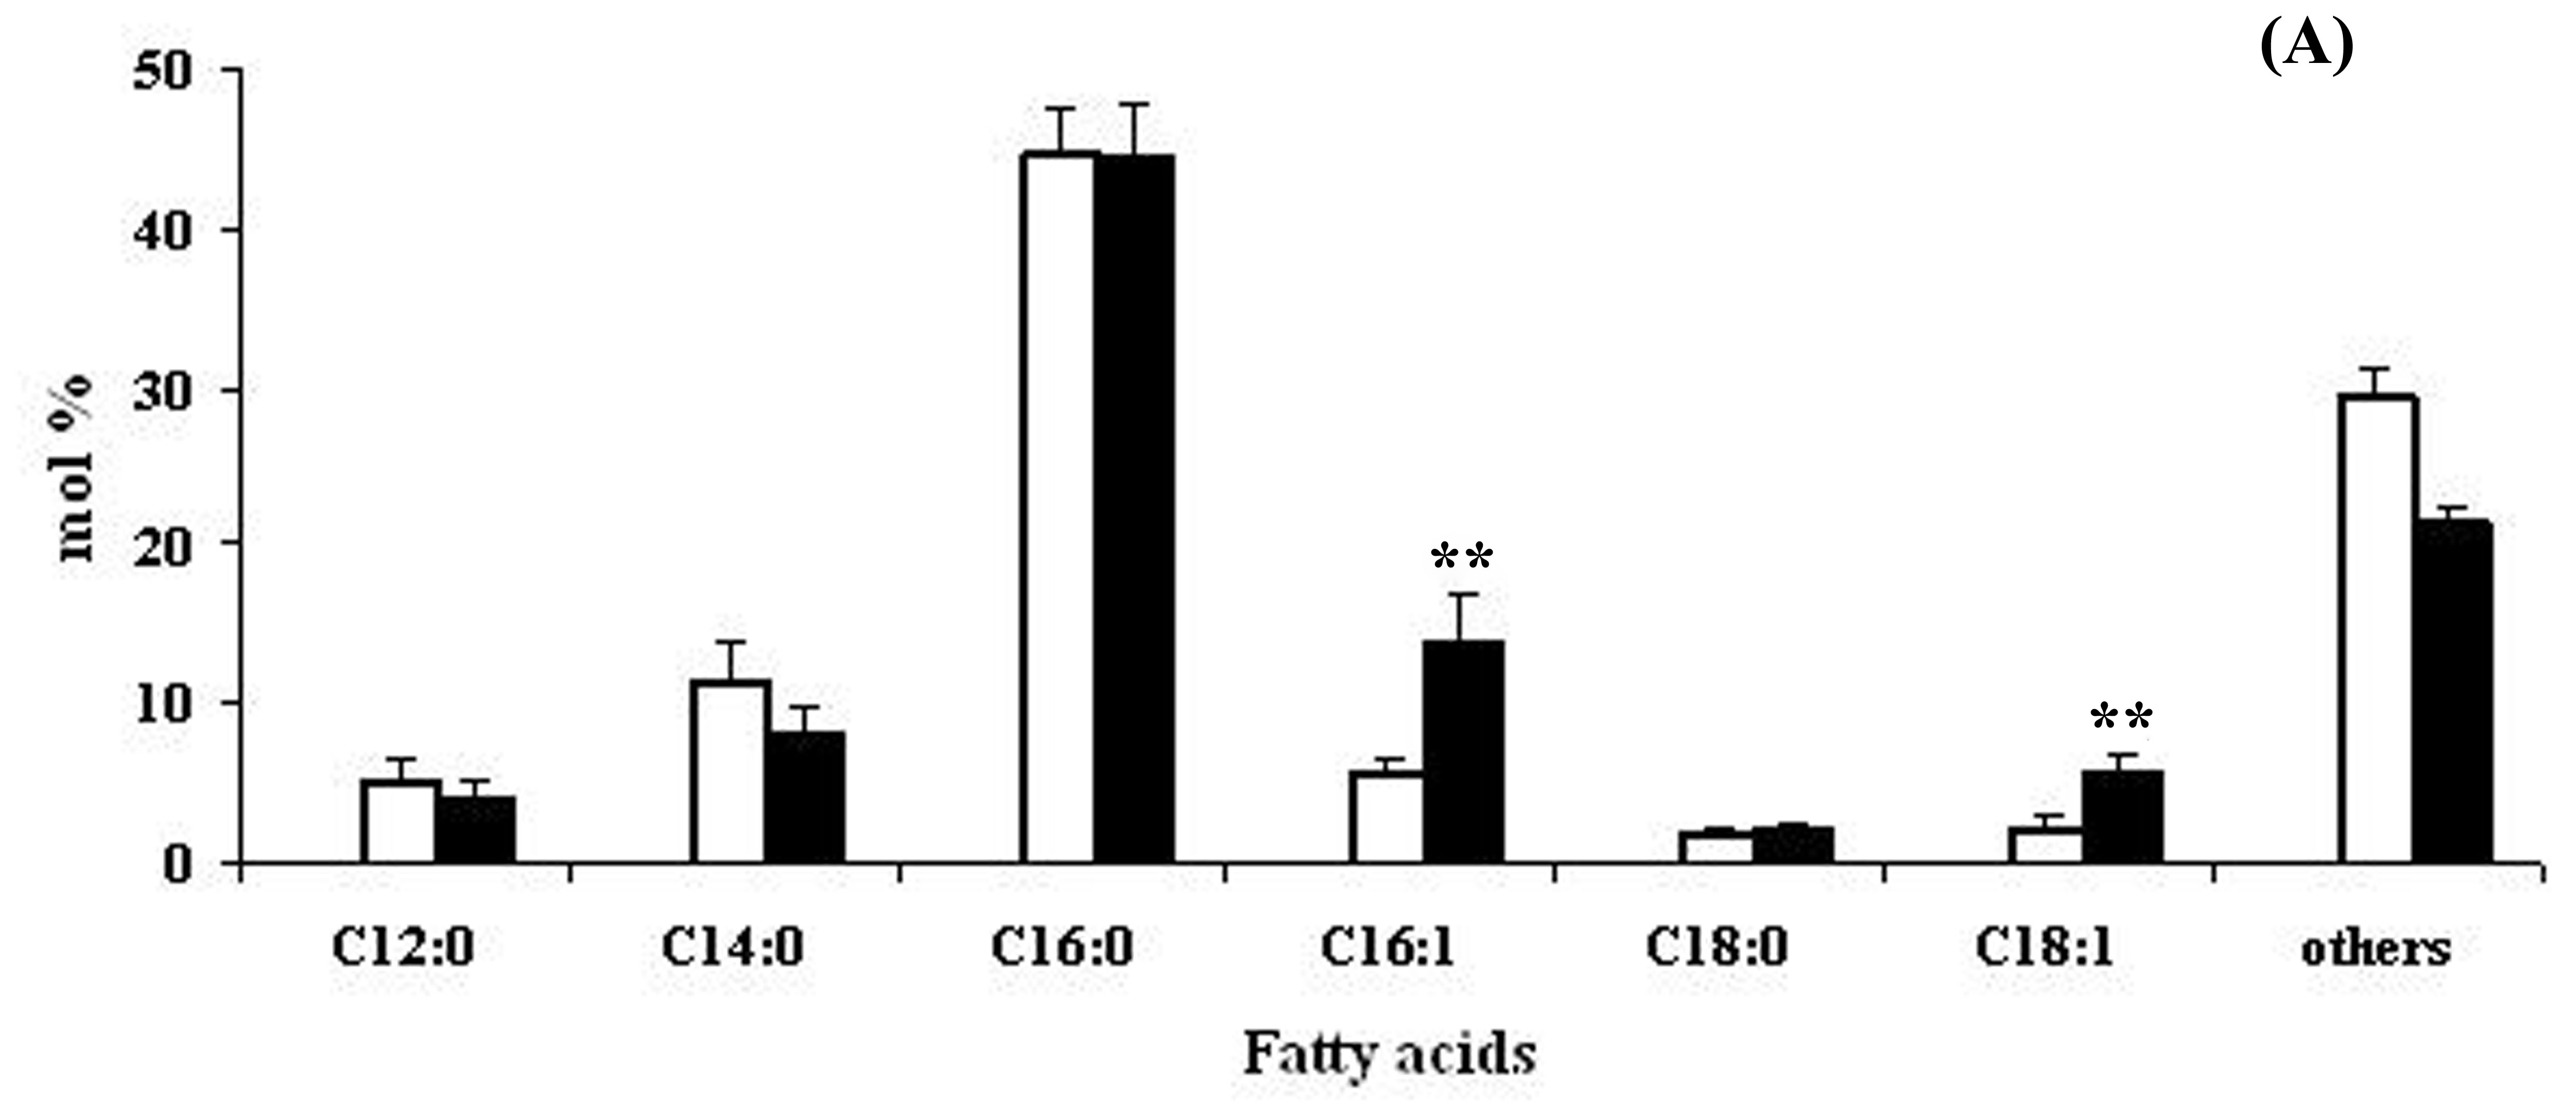


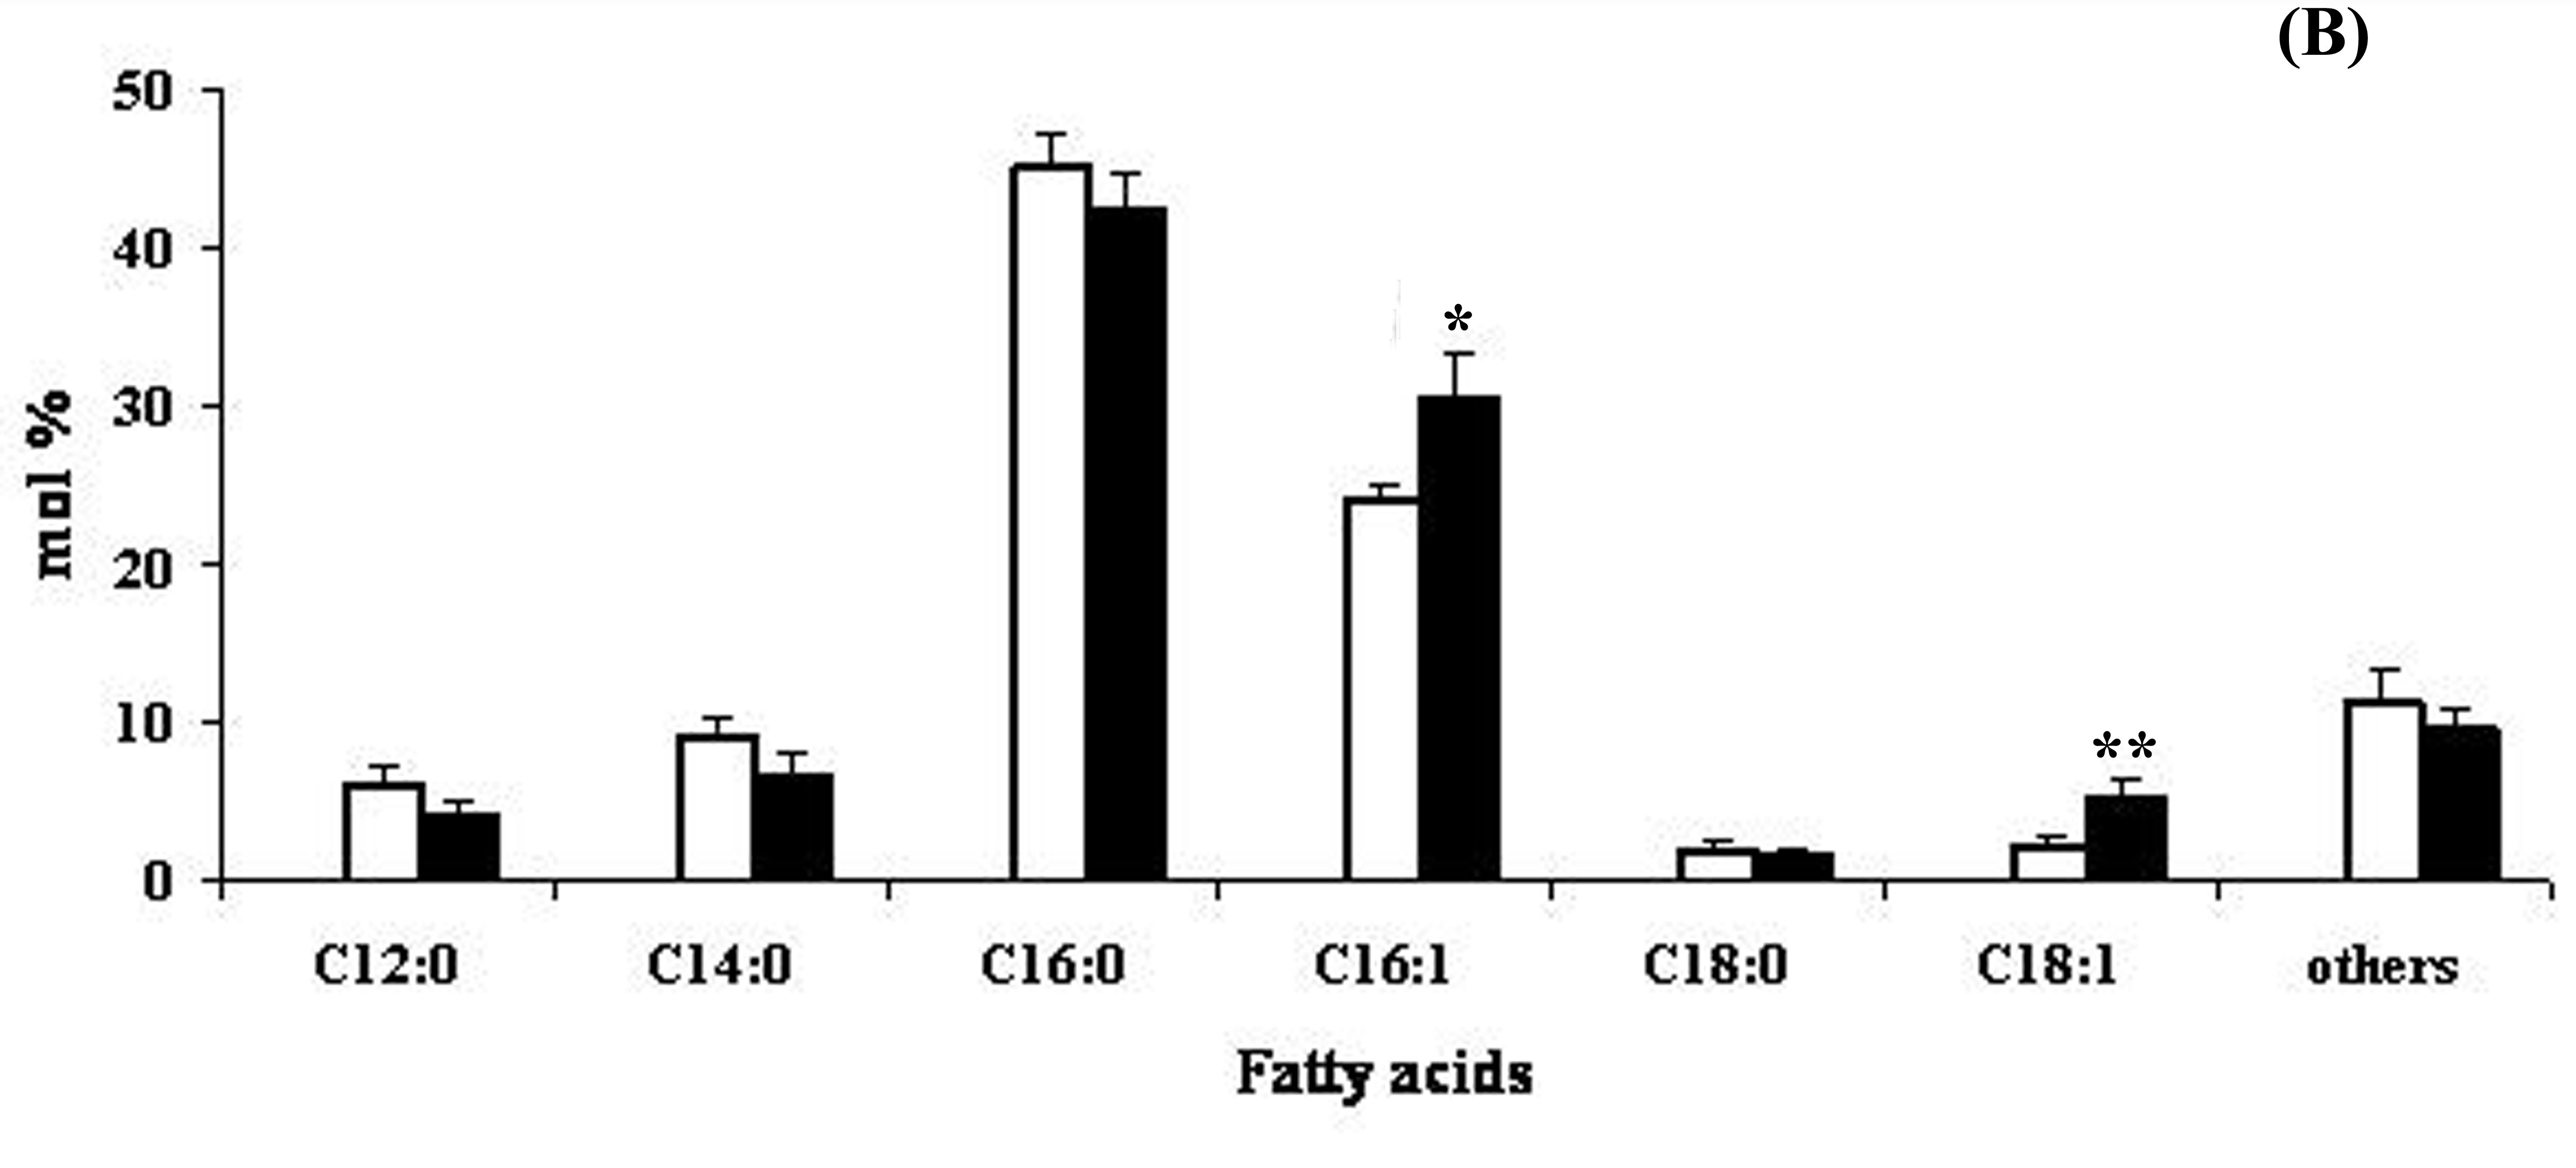


Supplementary FIGURE 2:Changes of fatty acids profiles in the membrane lipid of*E. coli* that expressing *Ah*FatA thioesterase at different temperatures. Individual fatty acids are represented by standard symbol. The ‘others’ include C13:0, C14:1, C15:0, C17:0, C17:1, C18:2, C18:3, C20:0, C20:1, C20:2, C21:0 and C23:0 fatty acids. Series 1 (white bars) and 2 (black bars) represent for the *E. coli* BL21 (DE3) celles that harboring the pGEX-4T-1 plasmid and the recombinant plasmid with the *Ah*FatA gene, respectively. The cultures were grown at 37℃ (A) and 25℃ (B). The results are the average and standard deviation of three independent determinations. *, **, Signicantly different from the wt at P<0.05, 0.01 respectively，by Student’s t-test.


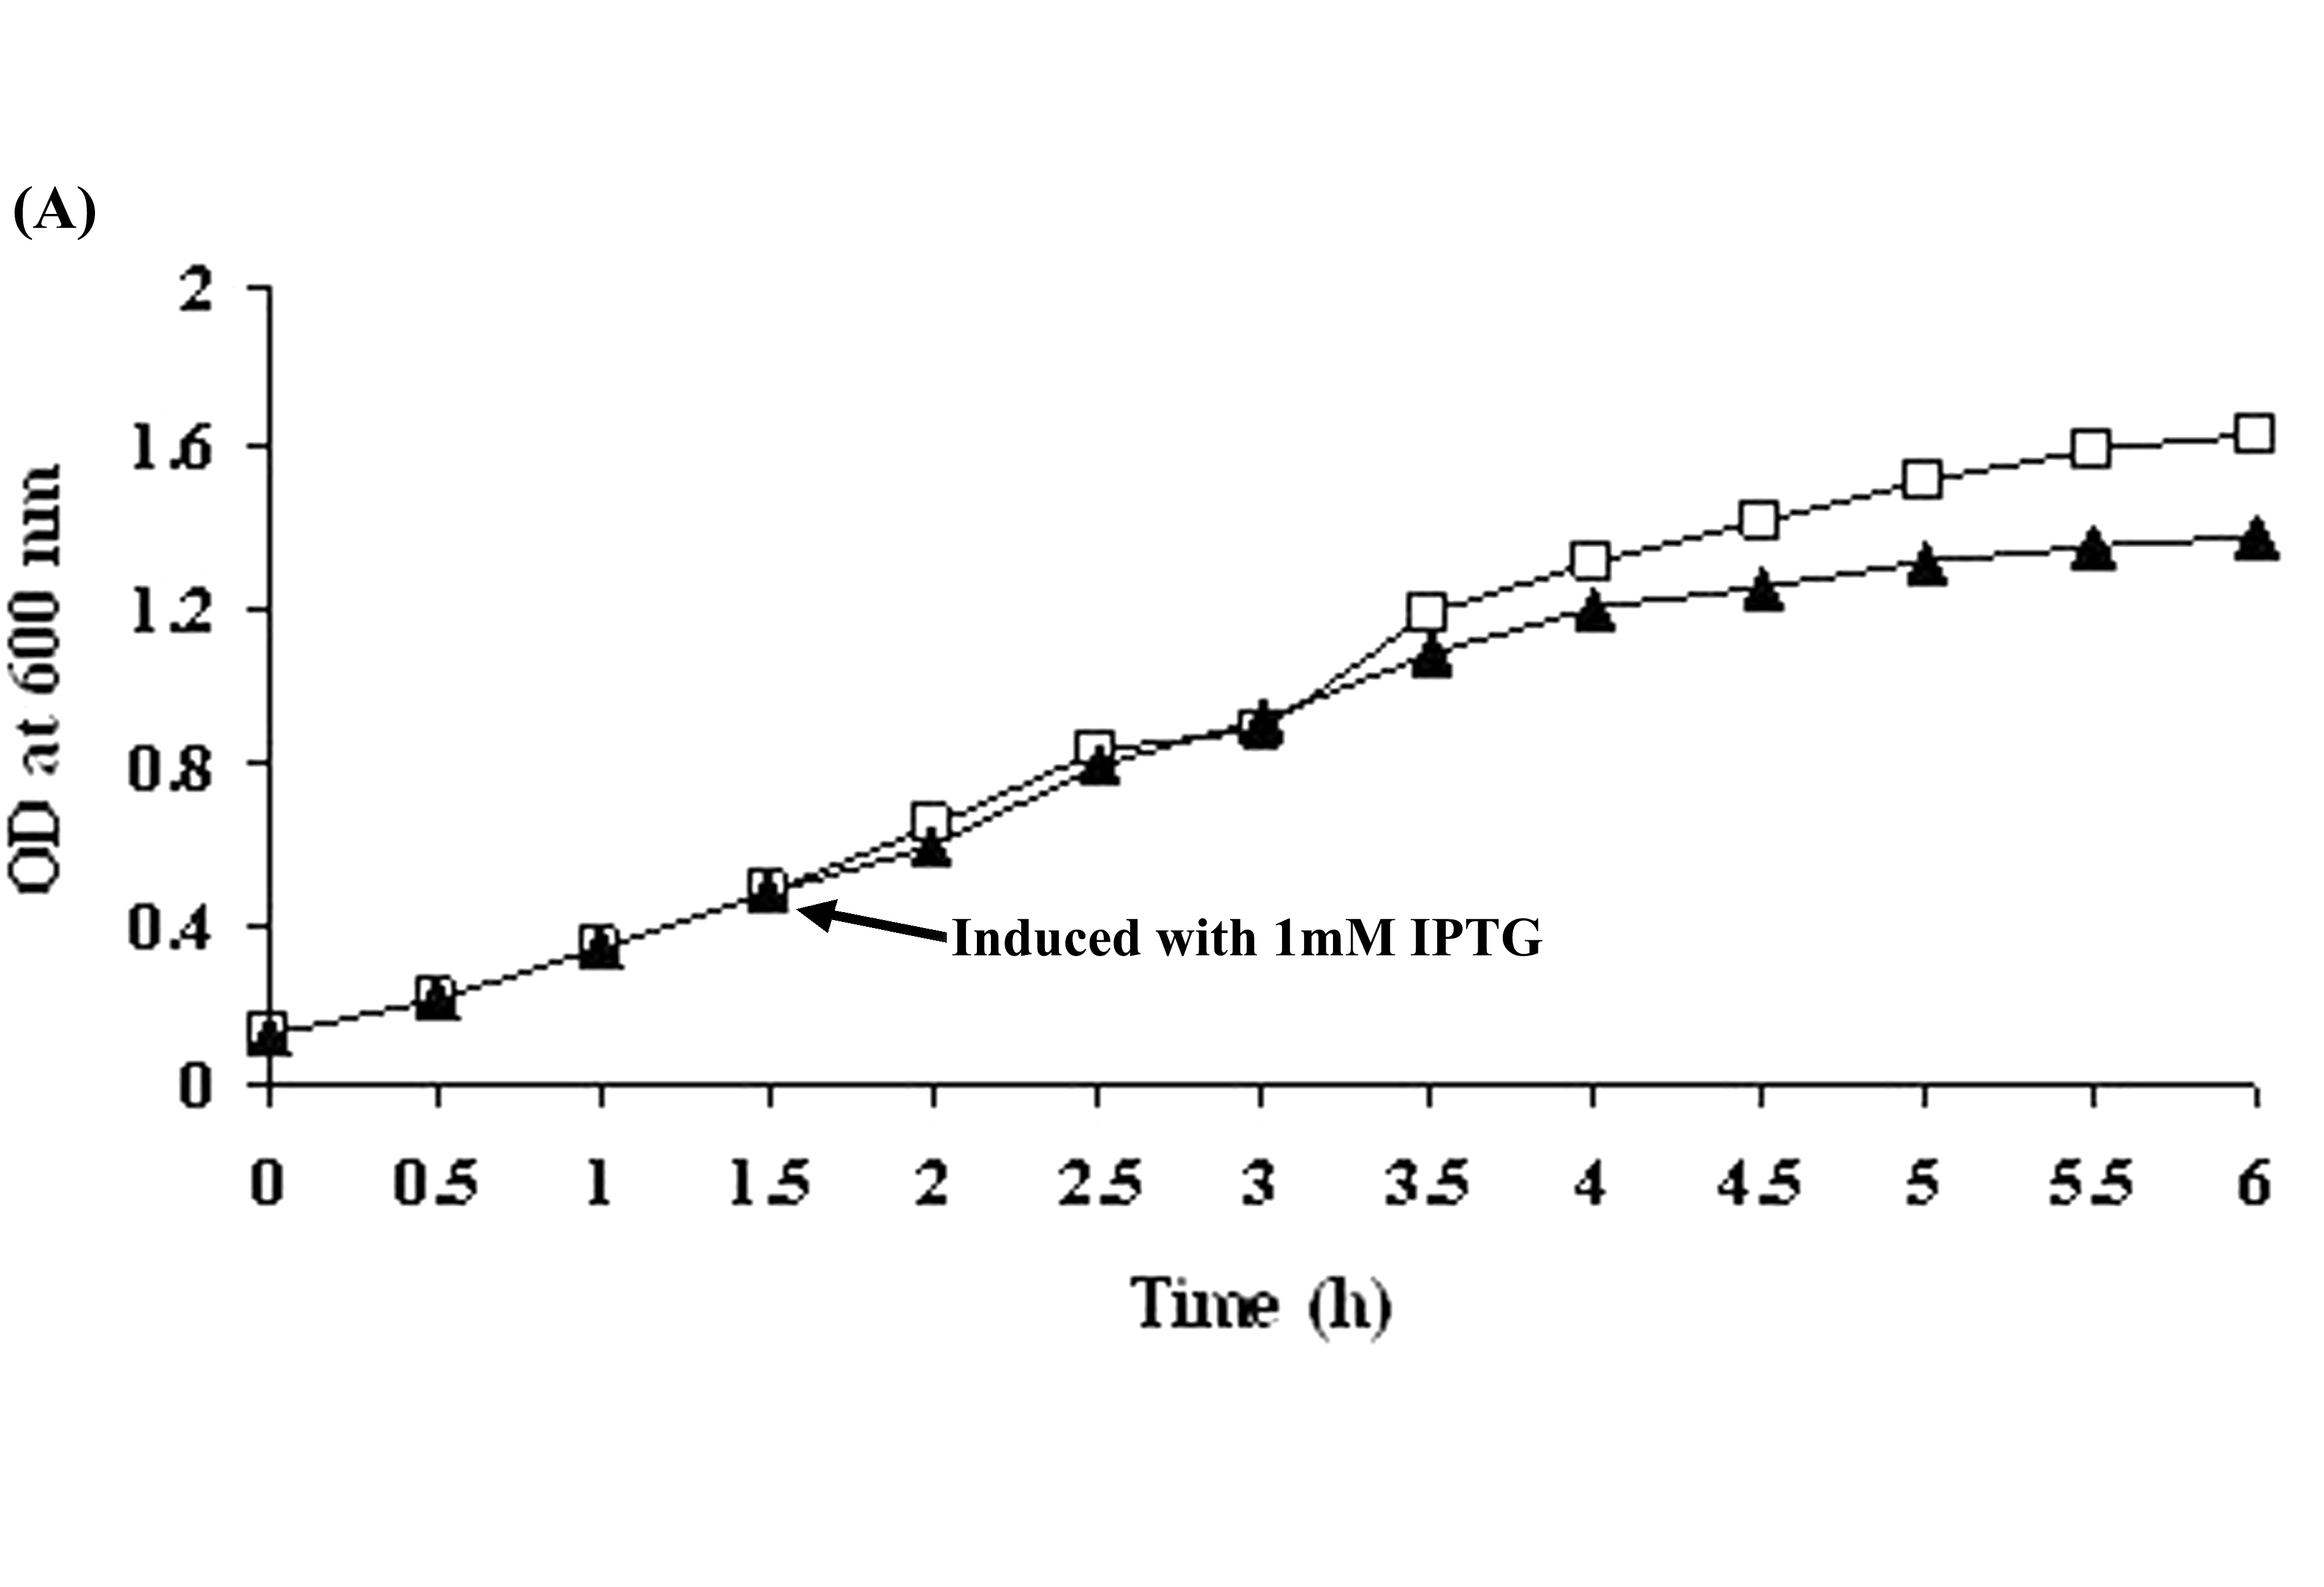


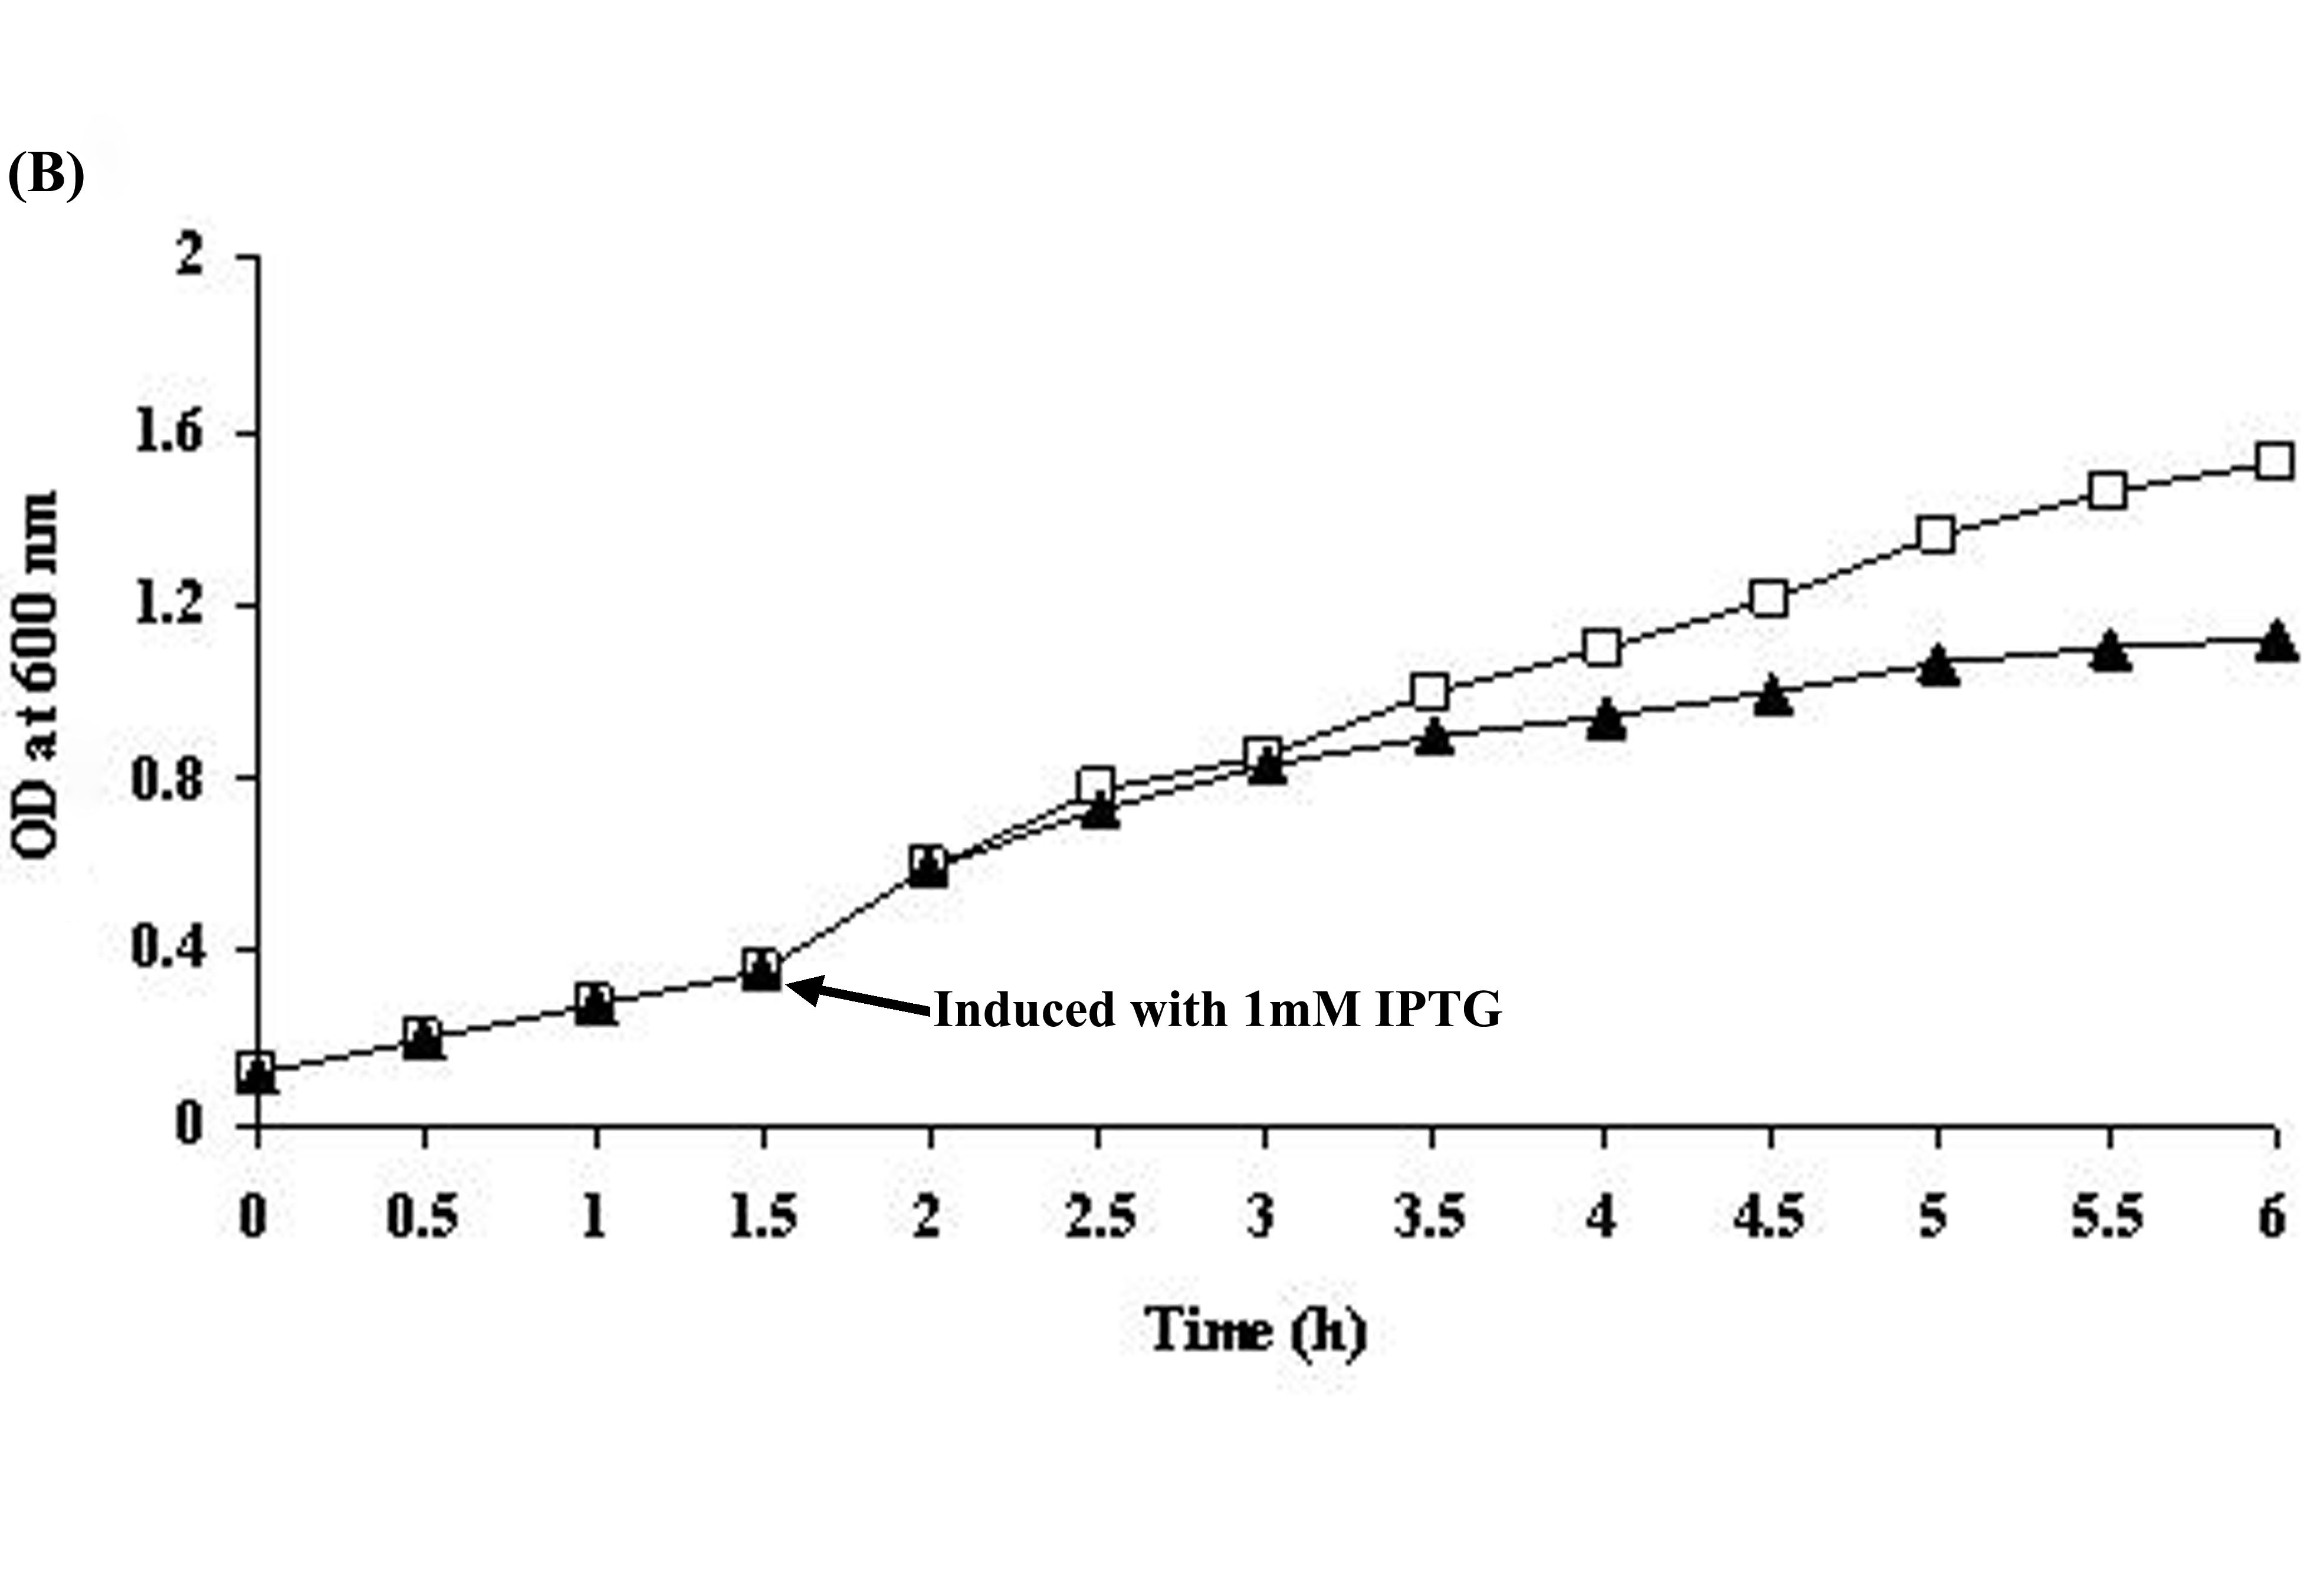


Supplementary FIGURE 3: Growth curve of *E. coli* BL21 (DE3) cells that harboring pGEX-4T-1 plasmid control (□) and pGEX-4T-1-*Ah*FatA plasmid (▲) at 37℃ (A) and 25℃ (B) of the culture induced with 1mM IPTG after 1.5 hours of starter culture.
